# Supplementary material for: Production of long chain alcohols and alkanes upon coexpression of an acyl-ACP reductase and aldehyde-deformylating oxygenase with a bacterial type-I fatty acid synthase in E. coli
Source: Royal Society of Chemistry journal article supplement (doi:10.1039/c5mb00268k), 2015-06-23
Supplement: c5mb00268k1.pdf [file c5mb00268k1.pdf]

## Electronic Supplementary Information

### **Production of Long Chain Alcohols and Alkanes Upon Coexpression of an Acyl-ACP Reductase and Aldehyde-Deformylating Oxygenase with a Bacterial Type-I Fatty Acid Synthase in *E. coli***

Dan Coursolle,<sup>a</sup> Jiazhang Lian,<sup>a</sup> John Shanklin,<sup>b</sup> and Huimin Zhao<sup>\*ac</sup>

<sup>a</sup> Department of Chemical and Biomolecular Engineering, Institute for Genomic Biology, University of Illinois at Urbana-Champaign, Urbana, IL 61801, USA.

<sup>b</sup> Brookhaven National Laboratory, P.O. Box 5000, 50 Bell Avenue, Building 463, Upton, NY 11973, USA.

<sup>c</sup> Departments of Chemistry, Biochemistry and Bioengineering, University of Illinois at Urbana-Champaign, Urbana, IL 61801, USA.

\*To whom correspondence should be addressed. Phone: (217) 333-2631. Fax: (217) 333-5052.

E-mail: zhao5@illinois.edu.

**Table S1.** Primers used in this study

| Origin                                  | Locus tag       | Primer pair sequences                                                       |
|-----------------------------------------|-----------------|-----------------------------------------------------------------------------|
| <i>Synechococcus elongatus</i> PCC 7942 | Synpcc7942_1594 | NNNccatggATGTTTCGGTCTTATCGGTCATC<br>NNNNNNNNNNgcggccgcTCAAATTGCCAATGCCAAGG  |
| <i>Cyanothece</i> sp. Strain ATCC 51142 | cce_1430        | NNNccatggATGTTTGGTTTAATTGGTCATC<br>NNNNNNNNNNgcggccgcTTACCAACTCAACAACGGTTG  |
| <i>Synechocystis</i> sp. PCC 6803       | SYNPCCP_2249    | NNNccatggATGTTTGGTCTTATTGGTCATC<br>NNNNNNNNNNgcggccgcCTAAAGAGCTACTAAAGGGC   |
| <i>Cyanothece</i> sp. PCC 8801          | PCC8801_0872    | NNNggatccATGTTTGGTCTGATCGGTCATC<br>NNNNNNNNNNgcggccgcTTACCAACTCAATAAAGGTCG  |
| <i>Cyanothece</i> sp. PCC 8802          | Cyan8802_0898   | NNNggatccATGTTTGGTCTGATCGGTCATC<br>NNNNNNNNNNgcggccgcTTACCAACTCAATAAAGGTCG  |
| <i>Cyanothece</i> sp. PCC 7425          | Cyan7425_0399   | NNNggatccATGTTTCGGATTAATTGGCCATC<br>NNNNNNNNNNgcggccgcCTACTGAAATAACAGGGGTTG |
| <i>Synechococcus elongatus</i> PCC 7942 | Synpcc7942_1593 | NNNagatctATGCCGCAGCTTGAAGCCAGC<br>NNNcctaggTCAAACGGCCGCAAGGCCATAG           |
| <i>Cyanothece</i> sp. Strain ATCC 51142 | cce_0778        | NNNagatctATGCAAGAGCTTGCTTTACGC<br>NNNcctaggTTAAGCAGCCCGTAGCCCGT             |
| <i>Synechocystis</i> sp. PCC 6803       | SYNPCCP_2250    | NNNagatctATGCCCGAGCTTGCTGTCCG<br>NNNcctaggCTAGACTCCGGCCAAACCGT              |
| <i>Cyanothece</i> sp. PCC 8801          | PCC8801_0455    | NNNagatctATGCAAGAGCTTGTTCCAACGC<br>NNNcctaggTTAAGCTGCCACTAAACCATG           |
| <i>Cyanothece</i> sp. PCC 8802          | Cyan8802_0468   | NNNagatctATGCAAGAGCTTGTTCCAACG<br>NNNcctaggTTAAGCTGCCACTAAGCCATG            |
| <i>Cyanothece</i> sp. PCC 7425          | Cyan7425_2986   | NNNagatctATGTCTGATTGCGCCACGAA<br>NNNcctaggCTAAGGCGTAACCGCCTGTA              |
|                                         | Cyan7425_0398   | NNNcctaggTTATGCCGCAGAGAGGCCGTA<br>NNNNNNNNNNcatatgATGCCTCAAGTGCAGTCCCCA     |

**Figure S1**

**A**

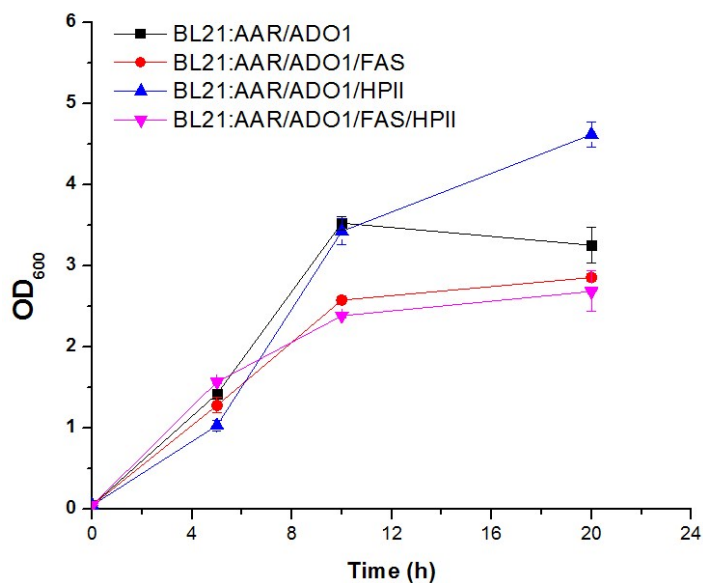

**B**

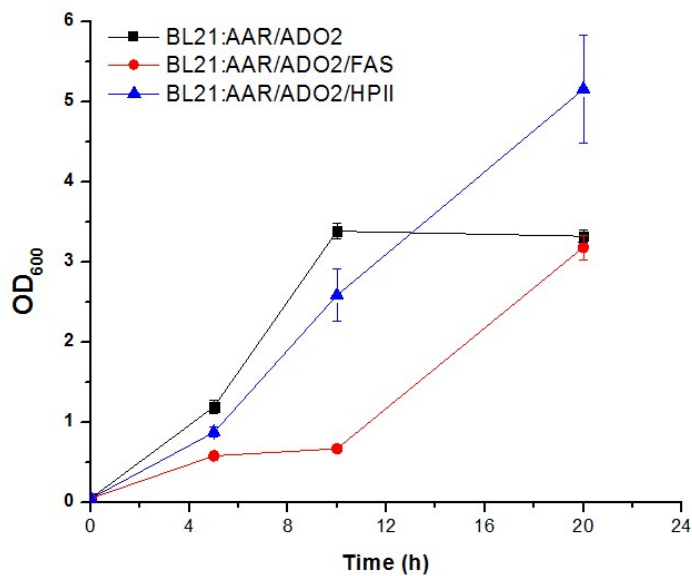

**Figure S1.** Growth curve of recombinant alkane-producing *E. coli* strains harboring ADO1 (A) or ADO2 (B). Cells were pre-cultured in LB medium overnight and inoculated into fresh modified M9 medium containing 3% glucose. After culture for 6 h, 0.5 mM IPTG was added to induce the expression of heterologous genes. Samples were taken at the mentioned time points and diluted 5-10 folds to measure the cell densities (absorbance at 600 nm) using a Biotek Synergy 2 Multi-Mode Microplate Reader (Winooski, VT).

**Figure S2**

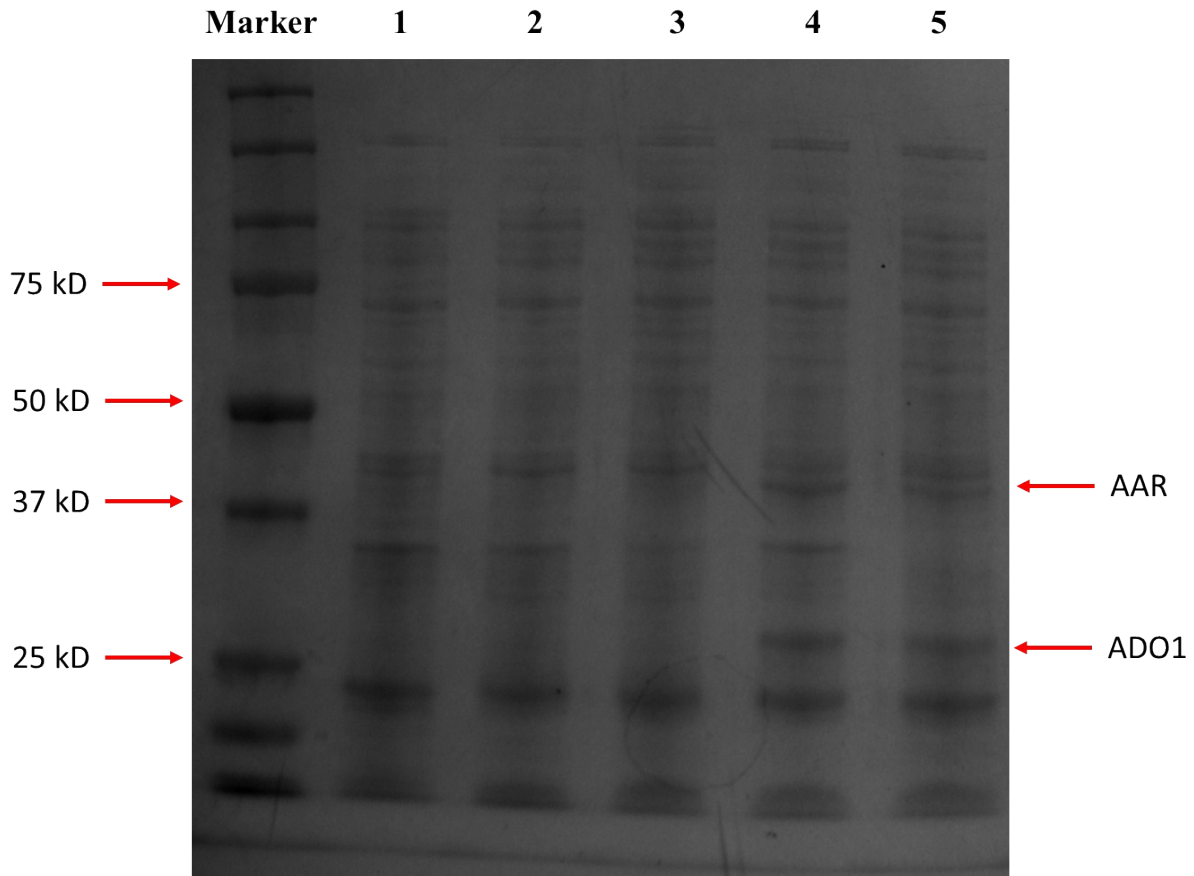

**Figure S2.** SDS-PAGE analysis of the expression of heterologous proteins. Cells were pre-cultured in LB medium overnight and inoculated into 10 mL fresh modified M9 medium containing 3% glucose. After additional culture for 6 h, 0.5 mM IPTG was added to induce the expression of heterologous genes. After induction for 16h, cells were harvested by centrifugation, washed twice in ddH<sub>2</sub>O, and resuspended in 1 mL 10 mM Tris-HCl pH8.0 buffer. Then the cells were disrupted by sonication using a Sonic Dismembrator Model 500 from Fisher Scientific until the solution became clear. Cell debris were removed by centrifugation at 15,000 rpm for 10 min at 4°C, and the resulting supernatants containing all the soluble proteins were analyzed by SDS-PAGE (12% Gel). Lane 1, BL21(DE3); Lane 2, BL21:AAR/ADO/FAS without IPTG induction; Lane 3: BL21:AAR/ADO/FAS/HPII; Lane 4: BL21:AAR/ADO/FAS; Lane 5: BL21:AAR/ADO.

Figure S3

A

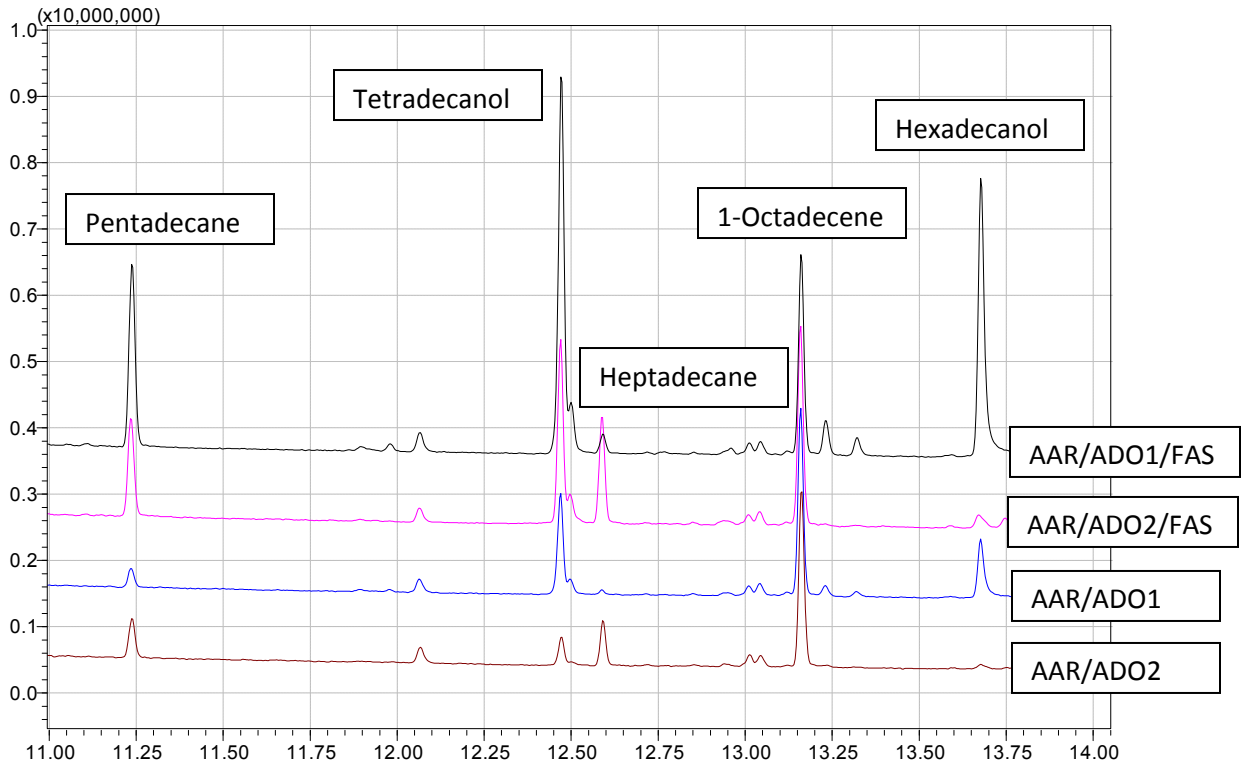

B

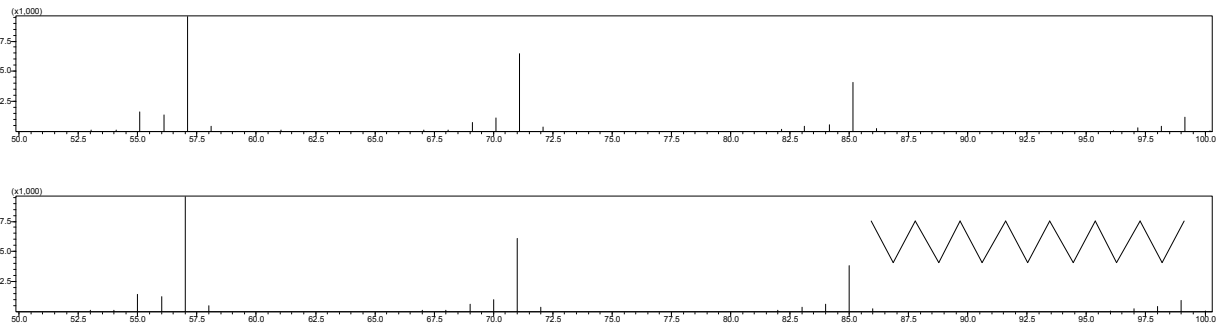

C

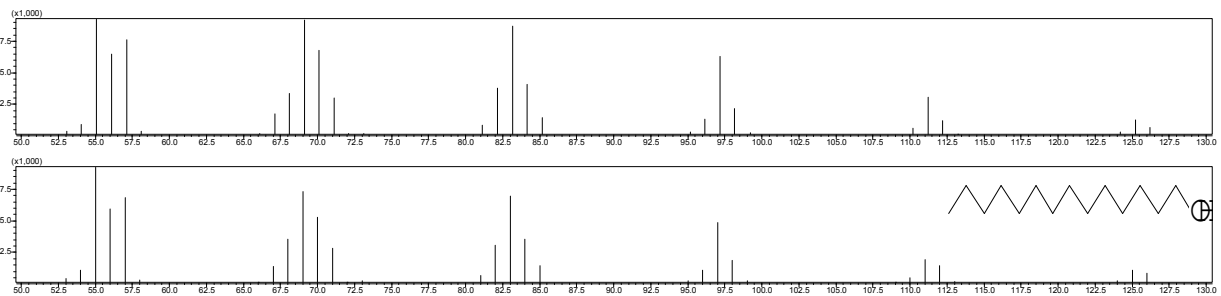

D

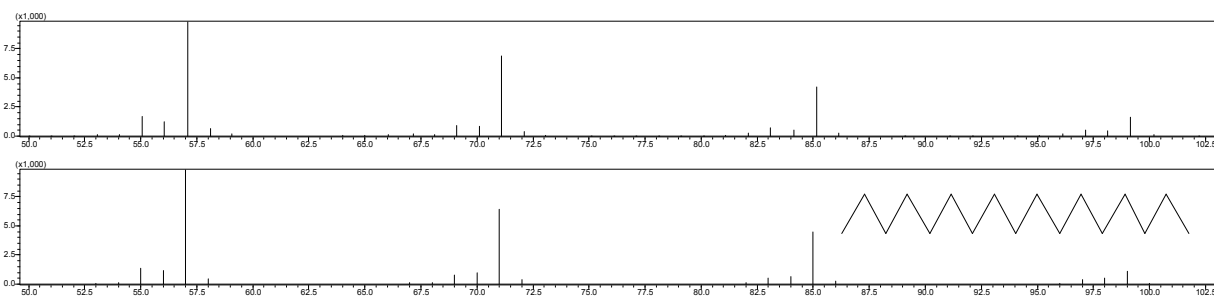

E

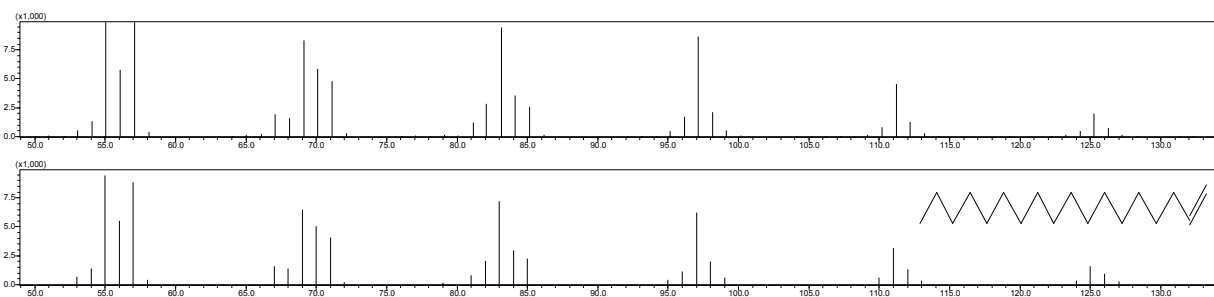

F

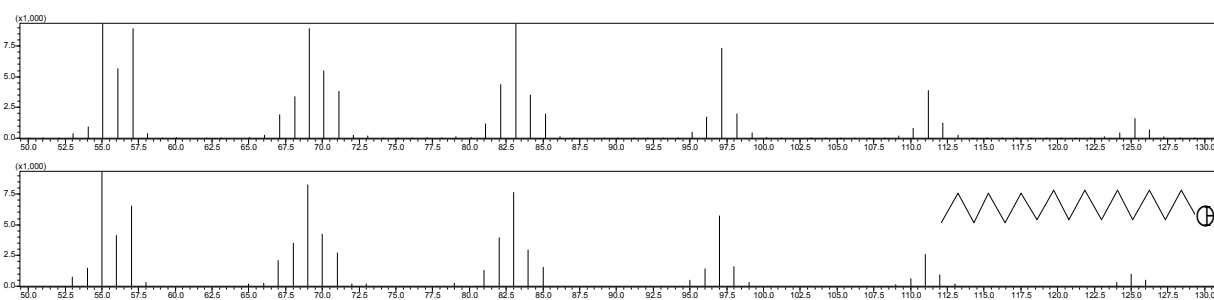

**Figure S3.** GC/MS traces of the product profiles of BL21:AAR/ADO1, BL21:AAR/ADO2, BL21:AAR/ADO1/FAS, and BL21:AAR/ADO2/FAS. The GC profiles (A) highlighted the major products (pentadecane, tetradecanol, heptadecane, and hexadecanol) and the internal standard (1-octadecene). B, C, D, E, and F showed the MS fragmentation pattern of pentadecane, tetradecanol, heptadecane, 1-octadecene, and hexadecanol, respectively, with the top panel showing the target and the bottom showing the corresponding standard.

Figure S4

A

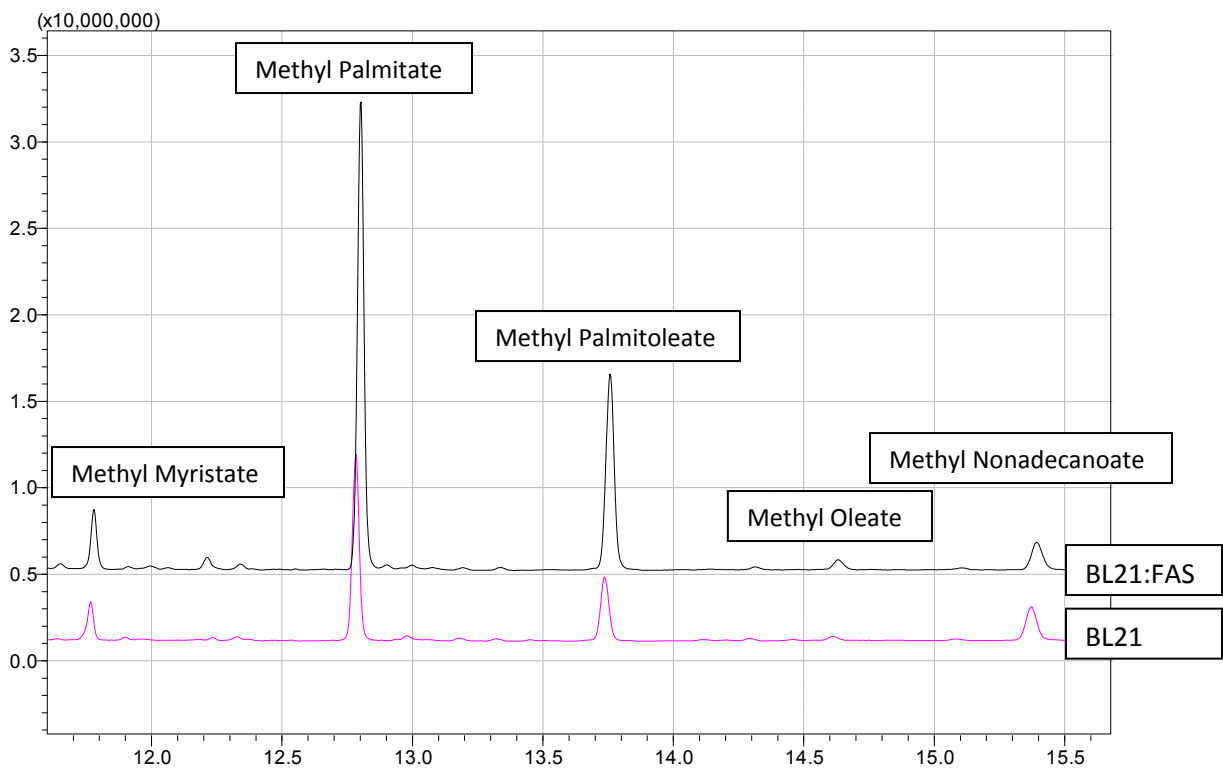

B

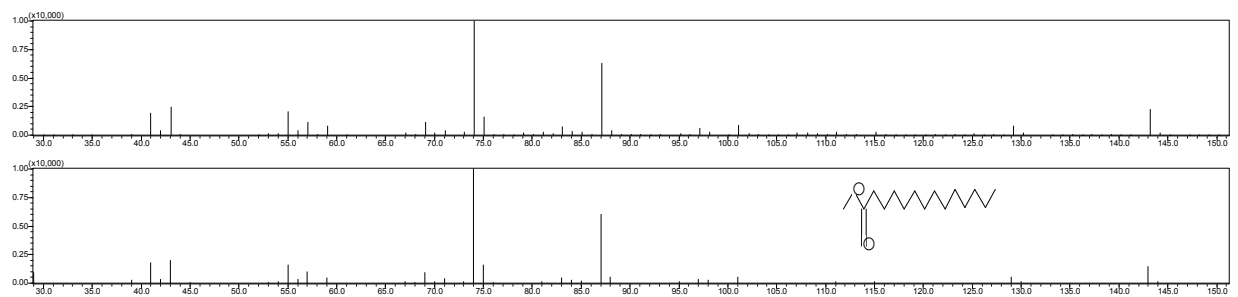

C

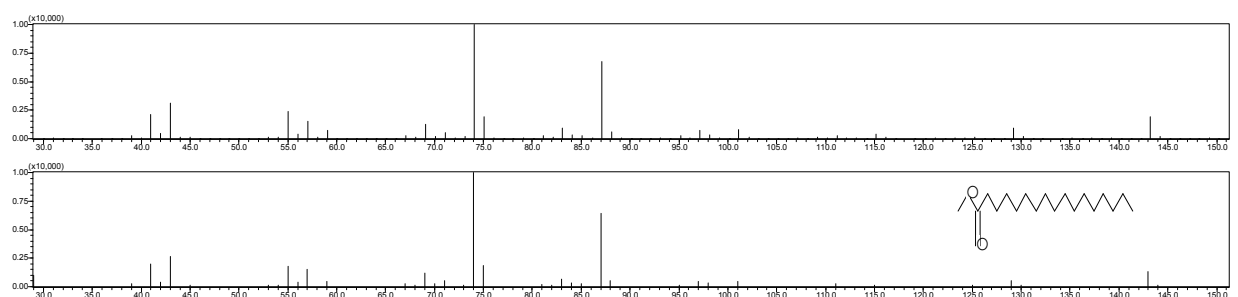

D

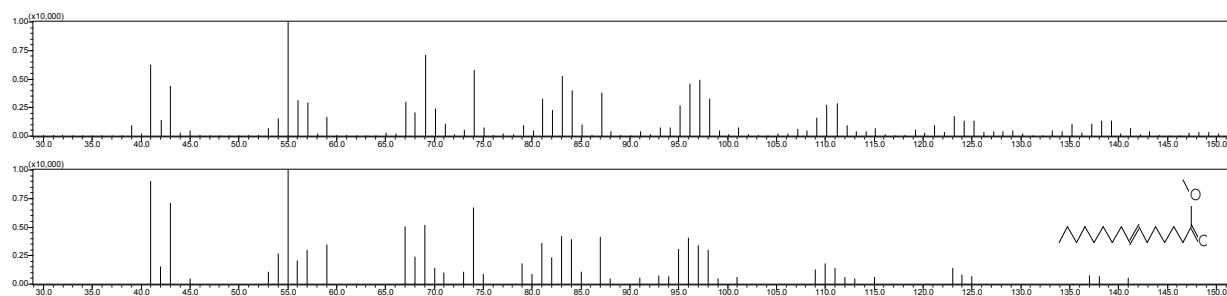

E

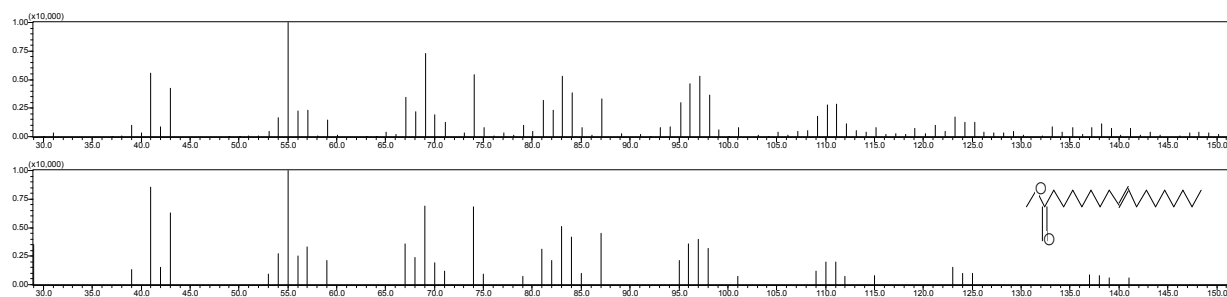

F

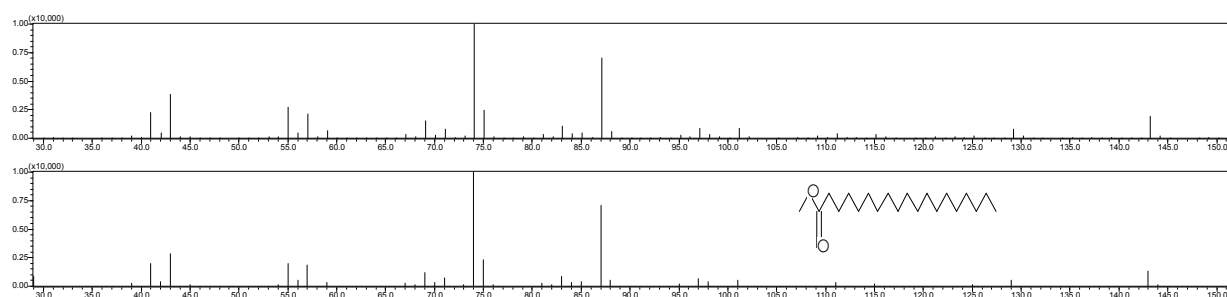

**Figure S4.** GC/MS traces of the product profiles of BL21: FAS. The GC profiles (A) highlighted the major fatty acids (myristic acid, palmitic acid, palmitoleic acid, and oleic acid) and the internal standard (nonadecanoic acid) in the methyl ester form. B, C, D, E, and F showed the MS fragmentation pattern of the methyl ester of myristic acid, palmitic acid, palmitoleic acid, oleic acid, and nonadecanoic acid, respectively, with the top panel showing the target and the bottom showing the corresponding standard.
